# Supplementary material for: Myeloid-derived suppressor cells therapy enhance immunoregulatory properties in acute graft versus host disease with combination of regulatory T cells
Source: PubMed Central journal article supplement (PMC7734831; doi:10.1186/s12967-020-02657-6), 2020-12-14
Supplement: 12967_2020_2657_MOESM1_ESM.pdf [file 12967_2020_2657_MOESM1_ESM.pdf]

**Table S1. Clinical GVHD scoring system**

| <b>Criteria</b> | <b>Grade 0</b> | <b>Grade 1</b>              | <b>Grade 2</b>                     |
|-----------------|----------------|-----------------------------|------------------------------------|
| Weight loss     | <10%           | >10% to <25%                | >25%                               |
| Posture         | Normal         | Hunching at rest            | Severe hunching, impaired movement |
| Activity        | Normal         | Mild to moderate decrease   | Severe decrease                    |
| Fur texture     | Normal         | Mild to moderate ruffling   | Severe ruffling, poor grooming     |
| Skin Integrity  | Normal         | Scaling of paws and/or tail | Obvious areas of denuded skin      |
