# Supplementary material for: Myeloid-derived suppressor cells therapy enhance immunoregulatory properties in acute graft versus host disease with combination of regulatory T cells
Source: PubMed Central journal article supplement (PMC7734831; doi:10.1186/s12967-020-02657-6), 2020-12-14
Supplement: 12967_2020_2657_MOESM2_ESM.pdf [file 12967_2020_2657_MOESM2_ESM.pdf]

**a** $\alpha$ CD3+ $\alpha$ CD28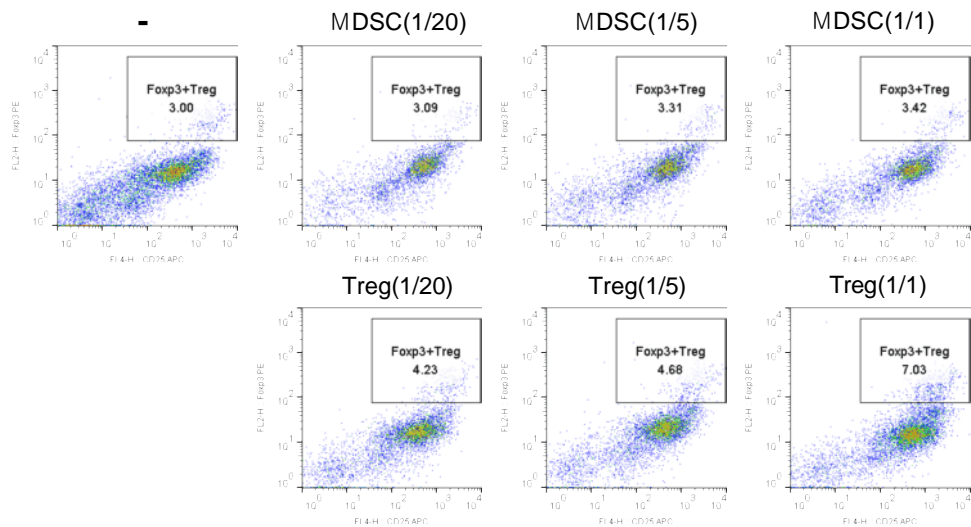

MDSC(1/20)+Treg(1/20) MDSC(1/20)+Treg(1/5) MDSC(1/5)+Treg(1/20) MDSC(1/5)+Treg(1/5)

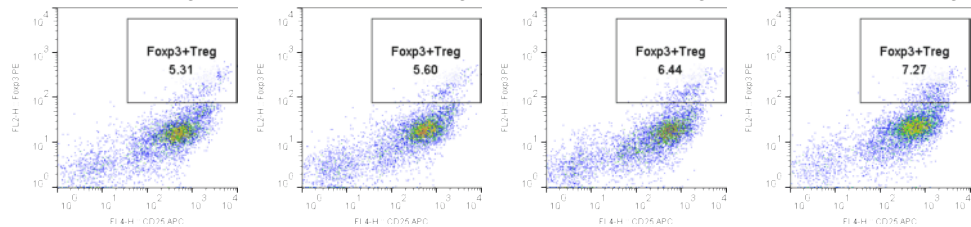**b** $\alpha$ CD3+ $\alpha$ CD28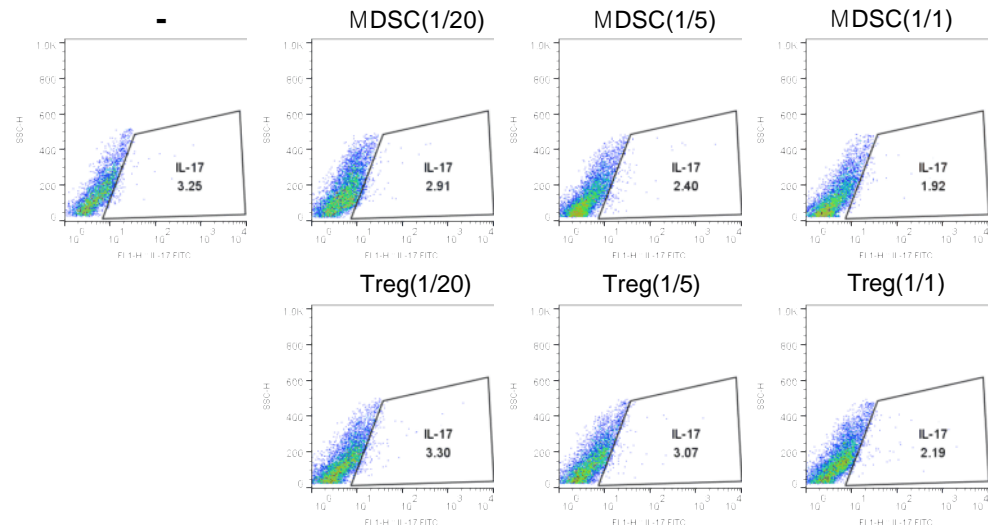

MDSC(1/20)+Treg(1/20) MDSC(1/20)+Treg(1/5) MDSC(1/5)+Treg(1/20) MDSC(1/5)+Treg(1/5)

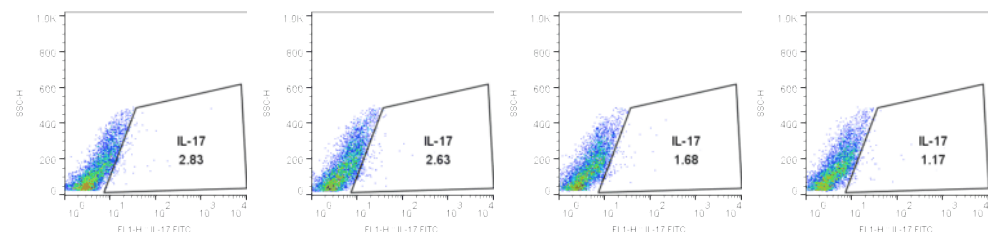

**Figure S1. in vitro does test of combined cell-therapy with MDSC and Treg on Treg/Th17 regulation**

CD4+T cell( $1 \times 10^6$ ) isolated from normal C57BL/6 mice were cocultured with MDSC or Treg alone or combined MDSC and Treg cells for 3 days in the presence of anti-mouse CD3 and CD28 antibody and analyzed by flow cytometry. A plot from one representative experiment displays the proportions of IL-17+, CD25+Foxp3+ cells among CD4+ T cells. Numbers in the plots indicate percentages of gated cells.
