# Supplementary material for: Myeloid-derived suppressor cells therapy enhance immunoregulatory properties in acute graft versus host disease with combination of regulatory T cells
Source: PubMed Central journal article supplement (PMC7734831; doi:10.1186/s12967-020-02657-6), 2020-12-14
Supplement: 12967_2020_2657_MOESM4_ESM.pdf [file 12967_2020_2657_MOESM4_ESM.pdf]

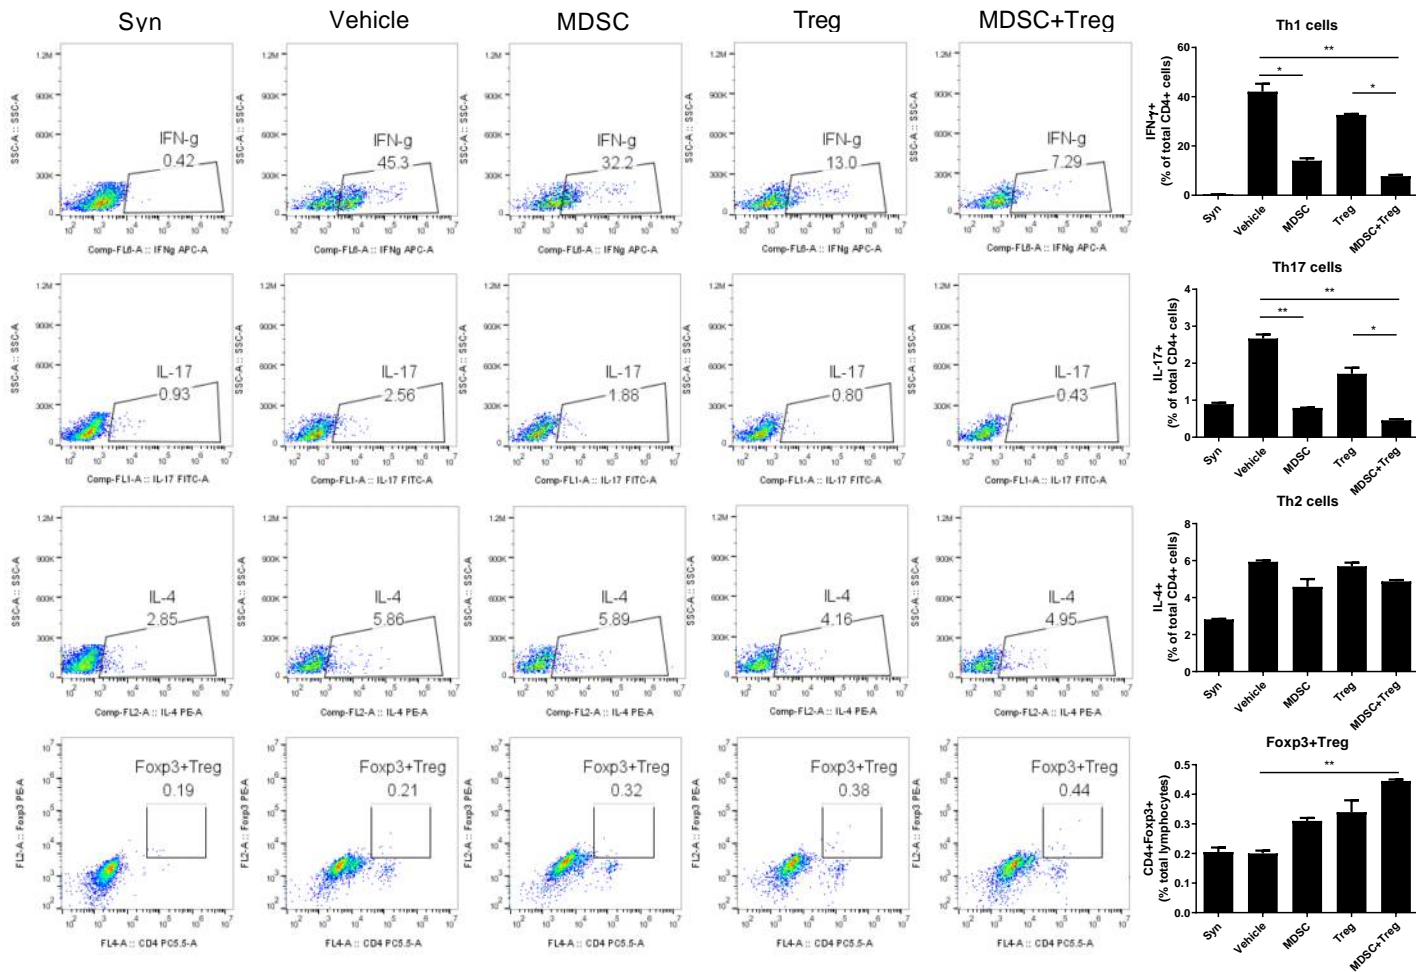

**Figure S3. Combined cell-therapy with MDSCs and Treg altered the subpopulation of T cell in peripheral blood.**

Twenty-eight days after BMT, peripheral blood from each group of mice were isolated and the expression levels of IL-4, IL-17, IFN- $\gamma$ , and Foxp3 were determined by flow cytometry. This experiment was performed once using 6 mice.\* $p < 0.05$ , \*\* $p < 0.01$ ). Numbers in the plots indicate percentages of gated cells.
